# Supplementary material
Source: publisher site journal article supplement (https://www.spandidos-publications.com/7328/downloadSupplementary)
Supplement: Supplementary file 1 [file downloadSupplementary]

## Sheet: Table S10
Table SX. Gene set enrichment analysis of differentially expressed genes.
	ID	Description	setSize	enrichmentScore	NES	pvalue	p.adjust	qvalues	rank	leading_edge	core_enrichment
KEGG_NEUROACTIVE_LIGAND_RECEPTOR_INTERACTION	KEGG_NEUROACTIVE_LIGAND_RECEPTOR_INTERACTION	KEGG_NEUROACTIVE_LIGAND_RECEPTOR_INTERACTION	272	-0.596488	-1.51293	0.00107991	0.0122716	0.00965335	4534	tags=25%, list=8%, signal=24%	CNR1/CHRNA1/CCKBR/HTR7/DRD4/GABRG3/CHRNB4/EDNRA/HTR2B/P2RY11/GPR35/OXTR/GALR2/PTGDR/CHRNB1/P2RY8/LPAR2/CYSLTR1/TBXA2R/TRPV1/PTGER2/NPFFR1/LTB4R/LPAR6/CHRNE/S1PR5/ADRB2/GRIN3B/LHB/GIPR/P2RX5/CTSG/CRHR2/P2RX1/F2RL3/PTGIR/HRH1/GRIA3/ADRA2C/FPR1/APLNR/KISS1R/C5AR1/GRM4/GABRD/ADRA1B/PTGER1/P2RY6/ADRA2A/GABRE/TSPO/S1PR4/P2RY10/S1PR2/PTGER4/ADORA1/PTAFR/GABBR2/PRSS1/P2RY13/ADORA3/SSTR3/FPR3/C3AR1/GLP1R/…
KEGG_CYTOKINE_CYTOKINE_RECEPTOR_INTERACTION	KEGG_CYTOKINE_CYTOKINE_RECEPTOR_INTERACTION	KEGG_CYTOKINE_CYTOKINE_RECEPTOR_INTERACTION	264	-0.736051	-1.8628	0.00108696	0.0122716	0.00965335	4508	tags=47%, list=8%, signal=43%	IL6/IL18RAP/IFNAR2/PDGFB/TNFSF10/IFNGR2/CCL24/CCL7/IFNA1/IL18R1/TGFB3/FLT3/TNFSF15/IL7/IL15/PDGFRA/CX3CL1/IL1R2/IL6R/IL4R/AMH/CCL25/TNFRSF13B/PDGFA/CCL20/FAS/IL3RA/CCL23/EPOR/CXCL12/XCR1/OSM/CRLF2/CXCL8/IL23A/IL2RA/TNFSF11/CCR10/TNFRSF10C/RELT/TNFSF12/TNF/LIF/TNFRSF9/CCR4/IL15RA/TNFSF9/CLCF1/CSF3R/LTA/TNFRSF1A/CXCL16/TNFSF8/IL1B/IFNG/TNFRSF14/CD27/TNFSF14/CD40LG/IL1RAP/MET/CCL8/CCL3/IL7R/CX3CR1/T…
KEGG_CHEMOKINE_SIGNALING_PATHWAY	KEGG_CHEMOKINE_SIGNALING_PATHWAY	KEGG_CHEMOKINE_SIGNALING_PATHWAY	188	-0.703935	-1.73051	0.00115473	0.0122716	0.00965335	4090	tags=40%, list=7%, signal=38%	LYN/CCL24/CCL7/GNB2/GNG11/PREX1/ADCY4/GNB3/GNG2/GRK6/CX3CL1/CCL25/CCL20/CCL23/CXCL12/GRK2/XCR1/ADCY7/CXCL8/GNAI2/CCR10/CSK/PIK3CG/HRAS/CCR4/RASGRP2/ITK/GNG8/CXCL16/GNGT2/CCL8/CCL3/CX3CR1/CCL26/CCR2/ARRB2/CCL22/CCL3L3/DOCK2/ADCY8/PIK3R5/CCR7/CCL17/XCL1/CCL21/PIK3CD/STAT1/PTK2B/CCL2/FGR/CXCR6/CCL4L2/NCF1/PLCB2/CXCR3/CXCR4/XCL2/CXCL2/TIAM1/CCR5/CCR1/CCL4/CXCL11/VAV1/HCK/WAS/CCL13/JAK3/CXCL13/CXCL10/…
KEGG_SYSTEMIC_LUPUS_ERYTHEMATOSUS	KEGG_SYSTEMIC_LUPUS_ERYTHEMATOSUS	KEGG_SYSTEMIC_LUPUS_ERYTHEMATOSUS	137	-0.798204	-1.92528	0.001221	0.0122716	0.00965335	3672	tags=39%, list=6%, signal=37%	H4C8/H2BC8/MACROH2A2/H2AC11/H2BU1/H4C11/H2AC6/SNRPD1/H4C12/H2BC9/SNRPB/H2BC11/C8G/H2AJ/CTSG/ACTN1/HLA-DMB/TNF/FCGR2C/CD28/TRIM21/IFNG/CD40LG/H2AC8/H2BC5/C4B/H2AX/FCGR2B/C4A/H2AW/C1S/C1R/C2/FCGR1A/HLA-DMA/C7/CD86/FCGR2A/CD40/HLA-DOB/HLA-DQB1/HLA-DRB1/HLA-DRB5/HLA-DRA/HLA-DPA1/HLA-DPB1/HLA-DOA/HLA-DQA2/FCGR3A/HLA-DQA1/C1QA/C1QC/C1QB/C3
KEGG_NATURAL_KILLER_CELL_MEDIATED_CYTOTOXICITY	KEGG_NATURAL_KILLER_CELL_MEDIATED_CYTOTOXICITY	KEGG_NATURAL_KILLER_CELL_MEDIATED_CYTOTOXICITY	132	-0.713245	-1.71242	0.00123153	0.0122716	0.00965335	7294	tags=52%, list=12%, signal=46%	KLRC2/KIR3DL1/ULBP2/MICA/KLRK1/RAC1/CASP3/SH2D1B/TNFRSF10D/TNFRSF10A/SHC4/KIR2DS4/KIR2DL4/PLCG2/PRKCB/NFATC4/IFNGR1/KIR3DL2/MAP2K2/NCR1/KLRC1/IFNAR2/TNFSF10/IFNGR2/KLRD1/ICAM2/IFNA1/RAET1E/FAS/CD244/TNFRSF10C/SH3BP2/FYN/TNF/MICB/PIK3CG/RAET1G/HRAS/PTPN6/IFNG/HLA-E/NCR3/FASLG/PIK3R5/SH2D1A/PIK3CD/PTK2B/LCP2/PRF1/ICAM1/ITGAL/CD247/ZAP70/CD48/HLA-G/BID/HLA-A/HCST/HLA-C/GZMB/CSF2/VAV1/HLA-B/LCK/ITGB2…
KEGG_CELL_ADHESION_MOLECULES_CAMS	KEGG_CELL_ADHESION_MOLECULES_CAMS	KEGG_CELL_ADHESION_MOLECULES_CAMS	131	-0.78693	-1.8873	0.00123457	0.0122716	0.00965335	4042	tags=55%, list=7%, signal=51%	CD274/ICAM2/NLGN2/CD58/CADM1/CDH15/CLDN6/CLDN15/NECTIN1/PDCD1LG2/HLA-DMB/CLDN3/ITGB8/SELP/ICAM3/CLDN5/CD276/CD28/ITGA4/CLDN11/ICOS/CNTNAP1/CD40LG/HLA-E/ITGB7/NRCAM/VCAM1/SIGLEC1/MAG/SPN/CDH2/CTLA4/CD8B/ITGAM/PTPRC/ICAM1/CD8A/ITGAL/SDC3/CD6/HLA-DMA/HLA-G/HLA-A/CD86/HLA-C/CLDN9/PDCD1/CD4/HLA-F/SDC4/CD40/HLA-DOB/HLA-B/SELL/HLA-DQB1/CD22/SELPLG/HLA-DRB1/HLA-DRB5/ITGB2/HLA-DRA/HLA-DPA1/HLA-DPB1/HLA-DO…
KEGG_LEUKOCYTE_TRANSENDOTHELIAL_MIGRATION	KEGG_LEUKOCYTE_TRANSENDOTHELIAL_MIGRATION	KEGG_LEUKOCYTE_TRANSENDOTHELIAL_MIGRATION	116	-0.697395	-1.655	0.00124688	0.0122716	0.00965335	5574	tags=45%, list=9%, signal=41%	PLCG2/PRKCB/MAPK13/PECAM1/RAPGEF3/TXK/MYL12A/CLDN4/MYL9/NOX1/CLDN6/RASSF5/MYL12B/CXCL12/CLDN15/THY1/ACTN1/GNAI2/CLDN3/PIK3CG/CLDN5/ITK/ITGA4/VASP/CLDN11/MAPK11/MMP2/MYLPF/VCAM1/PIK3R5/RHOH/SIPA1/CYBA/PIK3CD/PTK2B/ITGAM/ICAM1/NCF1/ITGAL/NCF2/CXCR4/CLDN9/CYBB/VAV1/NCF4/ITGB2/CLDN1/MMP9/CLDN2/CLDN16/RAC2/CLDN10
KEGG_TOLL_LIKE_RECEPTOR_SIGNALING_PATHWAY	KEGG_TOLL_LIKE_RECEPTOR_SIGNALING_PATHWAY	KEGG_TOLL_LIKE_RECEPTOR_SIGNALING_PATHWAY	102	-0.6908	-1.62199	0.00126582	0.0122716	0.00965335	6981	tags=44%, list=12%, signal=39%	FADD/NFKBIA/MAPK12/RAC1/TLR5/IL12B/TLR4/MAPK13/MAP2K7/MYD88/MAP2K2/IL6/IFNAR2/CASP8/IFNA1/LBP/TLR6/TLR2/TLR1/CXCL8/TNF/TLR8/PIK3CG/MAPK11/IRF3/IL1B/IKBKE/CTSK/CCL3/TLR7/PIK3R5/IRF7/PIK3CD/STAT1/IRF5/CD86/CD14/CCL4/LY96/CXCL11/CD40/SPP1/CXCL10/CCL5/CXCL9
KEGG_RIBOSOME	KEGG_RIBOSOME	KEGG_RIBOSOME	88	-0.805609	-1.87368	0.0012837	0.0122716	0.00965335	8822	tags=82%, list=15%, signal=70%	RPL15/RPL5/RPL6/RPL26L1/RPL4/RPS5/RPS12/RPL18A/RPS27/RPL21/RPS13/RPS27A/RPS25/RPS18/RPL27/RPS16/RPLP0/RPL37/RPL10A/RPS7/RPL39/RPL19/RPS6/RPL35A/RPL11/RPS10/RPL29/RPL3/RPL10/RPL31/RPL23/RPL7A/RPL9/RPL38/RPL14/RPS17/RPL26/RPL8/RPS15A/RPS29/RPL37A/RPL36AL/RPS27L/UBA52/RPS11/RPL13A/RPS8/RPS24/RPL27A/RPL32/RPS21/RPS3/RPL24/RPS4X/RPS28/RPL12/RPL18/RPSA/RPL34/RPS2/RPS20/RPL35/FAU/RPS15/RPL22L1/RPS9/RPLP…
KEGG_HEMATOPOIETIC_CELL_LINEAGE	KEGG_HEMATOPOIETIC_CELL_LINEAGE	KEGG_HEMATOPOIETIC_CELL_LINEAGE	85	-0.773502	-1.78733	0.00128535	0.0122716	0.00965335	3637	tags=58%, list=6%, signal=54%	FLT3/IL7/ITGA2/CD55/ITGA3/IL1R2/CD38/IL6R/IL4R/IL3RA/EPOR/IL2RA/CD1B/CD44/TNF/FCER2/ITGA4/CSF3R/CD33/IL1B/CR2/IL7R/CD1C/ANPEP/CSF2RA/CD1E/CD3G/CSF1/CD8B/CD19/ITGAM/CD8A/CD5/FCGR1A/CD1A/CD14/CD4/CSF1R/MS4A1/CSF2/CD37/CD22/CD7/HLA-DRB1/HLA-DRB5/HLA-DRA/CD3E/CD2/CD3D
KEGG_ANTIGEN_PROCESSING_AND_PRESENTATION	KEGG_ANTIGEN_PROCESSING_AND_PRESENTATION	KEGG_ANTIGEN_PROCESSING_AND_PRESENTATION	81	-0.788982	-1.81399	0.00129366	0.0122716	0.00965335	4827	tags=46%, list=8%, signal=42%	KIR3DL2/RFXANK/KLRC1/KLRD1/TAPBP/IFNA1/HLA-DMB/HSPA6/PSME1/LTA/CIITA/TAP2/HLA-E/B2M/PSME2/TAP1/CTSS/CD8B/CD8A/HLA-DMA/HLA-G/HLA-A/HLA-C/CD4/HLA-F/HLA-DOB/HLA-B/HLA-DQB1/CD74/HLA-DRB1/HLA-DRB5/HLA-DRA/HLA-DPA1/HLA-DPB1/HLA-DOA/HLA-DQA2/HLA-DQA1
KEGG_LEISHMANIA_INFECTION	KEGG_LEISHMANIA_INFECTION	KEGG_LEISHMANIA_INFECTION	70	-0.813939	-1.83633	0.00133333	0.0122716	0.00965335	5639	tags=64%, list=9%, signal=58%	IL4/IL12B/TLR4/PRKCB/MAPK13/NFKBIB/MARCKSL1/CR1/IFNGR1/MYD88/IFNGR2/TGFB3/PTGS2/TLR2/HLA-DMB/TNF/FCGR2C/PTPN6/ITGA4/MAPK11/IL1B/IFNG/CYBA/STAT1/ITGAM/TGFB1/NCF1/FCGR1A/HLA-DMA/NCF2/FCGR2A/HLA-DOB/HLA-DQB1/NCF4/HLA-DRB1/HLA-DRB5/ITGB2/HLA-DRA/HLA-DPA1/HLA-DPB1/HLA-DOA/HLA-DQA2/FCGR3A/HLA-DQA1/C3
KEGG_COMPLEMENT_AND_COAGULATION_CASCADES	KEGG_COMPLEMENT_AND_COAGULATION_CASCADES	KEGG_COMPLEMENT_AND_COAGULATION_CASCADES	69	-0.815123	-1.82684	0.00134953	0.0122716	0.00965335	3765	tags=43%, list=6%, signal=41%	CFB/A2M/C8G/CD55/F3/CFD/F5/PROC/F13A1/CR2/C5AR1/CFH/SERPINF2/C4B/C4A/PROS1/C1S/C1R/C2/C7/CFI/C3AR1/PLAUR/SERPING1/PLAU/C1QA/C1QC/C1QB/C3/SERPINA1
KEGG_VIRAL_MYOCARDITIS	KEGG_VIRAL_MYOCARDITIS	KEGG_VIRAL_MYOCARDITIS	68	-0.800065	-1.79066	0.00135135	0.0122716	0.00965335	2200	tags=44%, list=4%, signal=43%	HLA-DMB/FYN/CD28/CD40LG/HLA-E/PRF1/ICAM1/ITGAL/HLA-DMA/HLA-G/BID/HLA-A/CD86/HLA-C/DMD/HLA-F/CD40/HLA-DOB/HLA-B/HLA-DQB1/HLA-DRB1/HLA-DRB5/ITGB2/HLA-DRA/HLA-DPA1/HLA-DPB1/HLA-DOA/HLA-DQA2/HLA-DQA1/RAC2
KEGG_ARACHIDONIC_ACID_METABOLISM	KEGG_ARACHIDONIC_ACID_METABOLISM	KEGG_ARACHIDONIC_ACID_METABOLISM	58	-0.765594	-1.67479	0.00138504	0.0122716	0.00965335	5930	tags=47%, list=10%, signal=42%	PLA2G4A/CYP2E1/CYP2J2/CBR1/PLA2G6/PLA2G2A/CYP2C8/PTGS2/PLA2G10/PLA2G2C/PTGES/PTGDS/GPX4/PLA2G2E/PLA2G5/PTGS1/GPX1/LTC4S/CBR3/GGT6/HPGDS/GGT5/PLA2G12B/TBXAS1/ALOX15B/PLA2G2D/ALOX5
KEGG_CYTOSOLIC_DNA_SENSING_PATHWAY	KEGG_CYTOSOLIC_DNA_SENSING_PATHWAY	KEGG_CYTOSOLIC_DNA_SENSING_PATHWAY	55	-0.754342	-1.63994	0.0013947	0.0122716	0.00965335	6767	tags=40%, list=11%, signal=35%	NFKBIA/POLR1C/POLR3GL/NFKBIB/IL6/DDX58/RIPK3/IFNA1/IRF3/IL1B/IKBKE/ZBP1/IRF7/AIM2/CASP1/CCL4L2/STING1/IL18/CCL4/PYCARD/CXCL10/CCL5
KEGG_AUTOIMMUNE_THYROID_DISEASE	KEGG_AUTOIMMUNE_THYROID_DISEASE	KEGG_AUTOIMMUNE_THYROID_DISEASE	50	-0.820398	-1.75733	0.00141844	0.0122716	0.00965335	2618	tags=54%, list=4%, signal=52%	FAS/HLA-DMB/CD28/CD40LG/HLA-E/FASLG/CTLA4/PRF1/HLA-DMA/HLA-G/HLA-A/CD86/HLA-C/GZMB/HLA-F/CD40/HLA-DOB/HLA-B/HLA-DQB1/HLA-DRB1/HLA-DRB5/HLA-DRA/HLA-DPA1/HLA-DPB1/HLA-DOA/HLA-DQA2/HLA-DQA1
KEGG_TYPE_I_DIABETES_MELLITUS	KEGG_TYPE_I_DIABETES_MELLITUS	KEGG_TYPE_I_DIABETES_MELLITUS	41	-0.907697	-1.89173	0.0014556	0.0122716	0.00965335	2618	tags=68%, list=4%, signal=65%	FAS/HLA-DMB/TNF/CD28/LTA/IL1B/IFNG/HLA-E/FASLG/PRF1/HLA-DMA/HLA-G/HLA-A/CD86/HLA-C/GZMB/HLA-F/HLA-DOB/HLA-B/HLA-DQB1/HLA-DRB1/HLA-DRB5/HLA-DRA/HLA-DPA1/HLA-DPB1/HLA-DOA/HLA-DQA2/HLA-DQA1
KEGG_INTESTINAL_IMMUNE_NETWORK_FOR_IGA_PRODUCTION	KEGG_INTESTINAL_IMMUNE_NETWORK_FOR_IGA_PRODUCTION	KEGG_INTESTINAL_IMMUNE_NETWORK_FOR_IGA_PRODUCTION	46	-0.877646	-1.85825	0.00145985	0.0122716	0.00965335	2637	tags=67%, list=4%, signal=64%	CCL25/TNFRSF13B/MAP3K14/CXCL12/HLA-DMB/CCR10/IL15RA/PIGR/CD28/ITGA4/ICOS/CD40LG/ITGB7/TNFRSF13C/TNFSF13B/TGFB1/HLA-DMA/CXCR4/CD86/TNFRSF17/CD40/HLA-DOB/HLA-DQB1/HLA-DRB1/HLA-DRB5/HLA-DRA/HLA-DPA1/HLA-DPB1/HLA-DOA/HLA-DQA2/HLA-DQA1
KEGG_ALLOGRAFT_REJECTION	KEGG_ALLOGRAFT_REJECTION	KEGG_ALLOGRAFT_REJECTION	35	-0.926806	-1.89713	0.00146413	0.0122716	0.00965335	2618	tags=80%, list=4%, signal=77%	FAS/HLA-DMB/TNF/CD28/IFNG/CD40LG/HLA-E/FASLG/PRF1/HLA-DMA/HLA-G/HLA-A/CD86/HLA-C/GZMB/HLA-F/CD40/HLA-DOB/HLA-B/HLA-DQB1/HLA-DRB1/HLA-DRB5/HLA-DRA/HLA-DPA1/HLA-DPB1/HLA-DOA/HLA-DQA2/HLA-DQA1
KEGG_PRIMARY_IMMUNODEFICIENCY	KEGG_PRIMARY_IMMUNODEFICIENCY	KEGG_PRIMARY_IMMUNODEFICIENCY	35	-0.837904	-1.71515	0.00146413	0.0122716	0.00965335	2776	tags=69%, list=5%, signal=65%	IGLL1/TNFRSF13B/ADA/ICOS/CIITA/TAP2/CD40LG/IL7R/TNFRSF13C/TAP1/CD8B/CD19/PTPRC/CD8A/ZAP70/BTK/CD4/CD40/LCK/CD3E/IL2RG/JAK3/CD3D/CD79A
KEGG_GRAFT_VERSUS_HOST_DISEASE	KEGG_GRAFT_VERSUS_HOST_DISEASE	KEGG_GRAFT_VERSUS_HOST_DISEASE	37	-0.900494	-1.85695	0.00147275	0.0122716	0.00965335	2618	tags=84%, list=4%, signal=80%	KIR3DL2/IL6/KLRC1/KLRD1/FAS/HLA-DMB/TNF/CD28/IL1B/IFNG/HLA-E/FASLG/PRF1/HLA-DMA/HLA-G/HLA-A/CD86/HLA-C/GZMB/HLA-F/HLA-DOB/HLA-B/HLA-DQB1/HLA-DRB1/HLA-DRB5/HLA-DRA/HLA-DPA1/HLA-DPB1/HLA-DOA/HLA-DQA2/HLA-DQA1
KEGG_ASTHMA	KEGG_ASTHMA	KEGG_ASTHMA	28	-0.917639	-1.82155	0.00151745	0.0122716	0.00965335	2200	tags=61%, list=4%, signal=58%	HLA-DMB/TNF/CD40LG/FCER1A/HLA-DMA/CD40/HLA-DOB/HLA-DQB1/HLA-DRB1/HLA-DRB5/HLA-DRA/HLA-DPA1/HLA-DPB1/HLA-DOA/HLA-DQA2/FCER1G/HLA-DQA1
KEGG_ASCORBATE_AND_ALDARATE_METABOLISM	KEGG_ASCORBATE_AND_ALDARATE_METABOLISM	KEGG_ASCORBATE_AND_ALDARATE_METABOLISM	25	0.824438	1.77111	0.0028169	0.0201692	0.0158659	7410	tags=28%, list=12%, signal=25%	ALDH1B1/ALDH9A1/MIOX/ALDH7A1/ALDH2/UGT2B11/UGDH
KEGG_CITRATE_CYCLE_TCA_CYCLE	KEGG_CITRATE_CYCLE_TCA_CYCLE	KEGG_CITRATE_CYCLE_TCA_CYCLE	31	0.778843	1.74042	0.00299401	0.0201692	0.0158659	4449	tags=58%, list=7%, signal=54%	OGDHL/DLAT/ACO2/IDH3A/OGDH/SDHC/SUCLA2/DLD/SUCLG2/ACO1/FH/CS/ACLY/SDHD/DLST/SUCLG2P2/MDH2/SUCLG1
KEGG_BUTANOATE_METABOLISM	KEGG_BUTANOATE_METABOLISM	KEGG_BUTANOATE_METABOLISM	34	0.768103	1.73454	0.00309598	0.0201692	0.0158659	4862	tags=50%, list=8%, signal=46%	OXCT1/ALDH1B1/HMGCS1/ALDH9A1/L2HGDH/ALDH7A1/EHHADH/ACAT1/AACS/BDH1/HADH/ALDH5A1/HMGCS2/ACSM5/HADHA/ALDH2/ABAT
KEGG_LYSINE_DEGRADATION	KEGG_LYSINE_DEGRADATION	KEGG_LYSINE_DEGRADATION	44	0.78296	1.891	0.0031348	0.0201692	0.0158659	7086	tags=70%, list=12%, signal=62%	OGDHL/BBOX1/ALDH1B1/ALDH9A1/ASH1L/OGDH/AADAT/ALDH7A1/EHHADH/ACAT1/SETD7/TMLHE/HADH/AASDH/SETD2/SETDB1/NSD2/KMT5B/NSD1/KMT5A/DLST/HADHA/AASS/ALDH2/SUV39H2/PLOD2/SETD1B/NSD3/SETDB2/EHMT1/AASDHPPT
KEGG_VALINE_LEUCINE_AND_ISOLEUCINE_DEGRADATION	KEGG_VALINE_LEUCINE_AND_ISOLEUCINE_DEGRADATION	KEGG_VALINE_LEUCINE_AND_ISOLEUCINE_DEGRADATION	44	0.714172	1.72486	0.0031348	0.0201692	0.0158659	5359	tags=68%, list=9%, signal=62%	OXCT1/ALDH1B1/ALDH6A1/ACADSB/ACAD8/MCCC2/HMGCS1/ALDH9A1/AOX1/ACADM/ALDH7A1/PCCB/DBT/EHHADH/ACAT1/BCKDHB/DLD/HADHB/MMUT/PCCA/IVD/HADH/MCCC1/HMGCS2/HIBADH/HADHA/HIBCH/ALDH2/ABAT/BCAT2
KEGG_PROPANOATE_METABOLISM	KEGG_PROPANOATE_METABOLISM	KEGG_PROPANOATE_METABOLISM	33	0.830982	1.85988	0.00314465	0.0201692	0.0158659	7344	tags=76%, list=12%, signal=66%	ALDH1B1/ALDH6A1/ACACB/ALDH9A1/ACADM/ALDH7A1/PCCB/EHHADH/ACAT1/SUCLA2/SUCLG2/ACACA/MMUT/PCCA/ACSS1/SUCLG2P2/HADHA/SUCLG1/HIBCH/ALDH2/ABAT/ACSS2/LDHAL6A/MLYCD/LDHC
KEGG_T_CELL_RECEPTOR_SIGNALING_PATHWAY	KEGG_T_CELL_RECEPTOR_SIGNALING_PATHWAY	KEGG_T_CELL_RECEPTOR_SIGNALING_PATHWAY	108	-0.620114	-1.46209	0.00628141	0.0389447	0.0306356	2678	tags=38%, list=5%, signal=36%	IL4/MAPK13/NFKBIB/MAP2K7/NFATC4/MAP2K2/NCK2/CBLC/GRAP2/MAP3K14/FYN/TNF/PIK3CG/HRAS/PTPN6/CD28/ITK/MAPK11/ICOS/IFNG/CD40LG/RASGRP1/PIK3R5/CD3G/PIK3CD/CTLA4/CD8B/LCP2/PTPRC/NFKBIE/CD8A/CD247/ZAP70/PDCD1/CD4/CSF2/VAV1/LCK/CARD11/CD3E/CD3D
KEGG_NOD_LIKE_RECEPTOR_SIGNALING_PATHWAY	KEGG_NOD_LIKE_RECEPTOR_SIGNALING_PATHWAY	KEGG_NOD_LIKE_RECEPTOR_SIGNALING_PATHWAY	62	-0.69621	-1.53809	0.00683995	0.0410397	0.0322836	8180	tags=55%, list=14%, signal=47%	CARD6/NLRP1/RELA/CXCL1/CASP5/NFKBIA/MAPK12/PYDC1/MAPK13/NFKBIB/TRIP6/IL6/TNFAIP3/CASP8/CCL7/NLRC4/NOD2/NLRP3/CXCL8/TNF/MAPK11/IL1B/CCL8/CARD9/BIRC3/CASP1/CCL2/PSTPIP1/NOD1/CXCL2/IL18/PYCARD/CCL13/CCL5
KEGG_PROTEASOME	KEGG_PROTEASOME	KEGG_PROTEASOME	46	-0.751358	-1.59086	0.00729927	0.042427	0.033375	5257	tags=50%, list=9%, signal=46%	PSMA5/PSMB7/PSMA3/PSMB2/PSMB4/PSMA7/PSMC3/PSMA4/POMP/PSMB6/PSMD4/SEM1/PSMD13/PSMC5/PSMB1/PSMA1/PSMB3/PSME1/IFNG/PSME2/PSMB10/PSMB8/PSMB9
